# Supplementary material for: Combination of hematin and PEDOT via 1-pyrenebutanoic acid: a new platform for direct electrochemistry of hematin and biosensing applications
Source: Royal Society of Chemistry journal article supplement (doi:10.1039/c4ra05886k), 2014-01-01
Supplement: c4ra05886k1.pdf [file c4ra05886k1.pdf]

## Supporting Information

### **Combination of Hematin and PEDOT via 1-Pyrenebutanoic acid: A new platform for direct electrochemistry of hematin and biosensing applications**

Xuehua Yu<sup>1</sup>, Jinming Kong<sup>1\*</sup>, Xiaojun Han<sup>2</sup> and Xueji Zhang<sup>1,3\*</sup>

<sup>1</sup>School of Environmental and Biological Engineering

Nanjing University of Science & Technology

No. 200 Xiaolingwei, Xuanwu District, Nanjing, P. R. China 210094

<sup>2</sup>State Key Laboratory of Urban Water Resource and Environment,

School of Chemical Engineering and Technology,

Harbin Institute of Technology, Harbin 150001, China.

<sup>3</sup>Chemistry Department, College of Arts and Sciences

University of South Florida, 4202 East Fowler Ave, Tampa, FL, 33620

Corresponding Author: Jinming Kong, Xueji Zhang

Email: j.kong@njust.edu.cn, xueji@usf.edu

### **Experimental Section**

#### ***Apparatus***

The electrochemical experiments were performed on CHI660D (CH Instruments, Shanghai, China). Electrochemical impedance Spectroscopy (EIS) was measured by Autolab PGSTAT302N (Metrohm, Switzerland). Field emission scanning electron microscope (FE-SEM) and X-ray photoelectron spectroscopy (XPS) were carried out

with S-4800 (Hitachi Co., Ltd., Japan) and PHI Quantera II (Japan). Electrochemical experiments were performed with a three-electrode system, with bare GCE ( $d=3$  mm) as the working electrode, a platinum wire as the auxiliary electrode, and an Hg/HgCl/Saturated KCl as the reference electrode.

### ***Materials***

3,4-Ethylenedioxythiophene and Poly(4-styrenesulfonate) sodium was obtained from Aladdin reagents. PBA was purchased from J&K (Shanghai, China).  $ZrOCl_2$  and hematin were purchased from Sigma (USA).  $H_2O_2$ , N,N-Dimethylformamide (DMF) and absolute alcohol were all obtained from Sinopharm Chemical Reagent (Beijing, China). All reagents used were of analytical grade.

### ***Electrode preparation***

GCEs were carefully polished to a mirror like surface by polishing by  $0.05\ \mu\text{m}$  alumina slurry first, followed by ultrasonication in anhydrous ethanol and double distilled deionized water for 3 min, respectively. After drying the electrode with nitrogen, the EDOT was polymerized on the GCE by CV with 8 potential cycles from  $-0.1$ - $1.0$  V at a scan rate of  $100\ \text{mV}\cdot\text{s}^{-1}$ , in PBS containing  $10\ \text{mmol}\cdot\text{L}^{-1}$  EDOT and  $0.3\ \text{mg}\cdot\text{mL}^{-1}$  PSS under magnetic stirring and  $N_2$  degassing [Fig. S1];<sup>[1]</sup> then the treated GCEs were cleaned in  $0.5\ \text{mL}$  ultrapure water by stirring 1 min and dried with  $N_2$ . After that, the GCEs were incubated in  $0.5\ \text{mL}$ ,  $2.3\ \text{mg}\cdot\text{mL}^{-1}$  solution of PBA in DMF for 2 h. Then the GCE was rinsed with  $1\ \text{mL}$  DMF and  $1\ \text{mL}$  ultrapure water successively. After drying with  $N_2$ , the GCE was immersed in  $1\ \text{mg}\cdot\text{mL}^{-1}$   $ZrOCl_2$  solution (Water: ethanol=2:3) for 30 min, then  $4\ \mu\text{L}$   $0.1\ \text{mmol}\cdot\text{L}^{-1}$  hematin in DMF

was deposited on GCE surface for other 30 min, then GCE was cleaned with DMF and ultrapure water respectively.

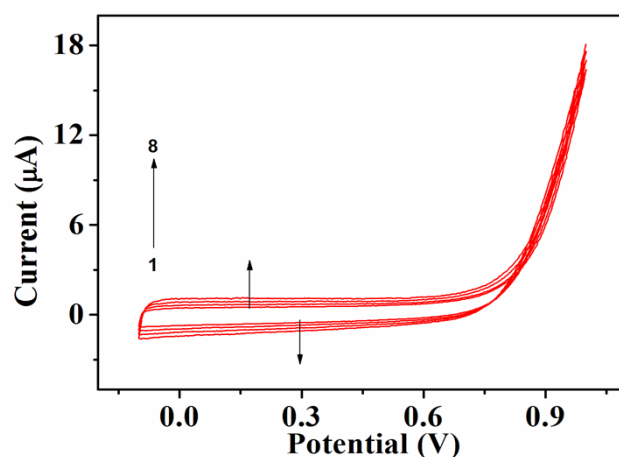

Fig. S1 CVs of GCE in 0.01 mol·L<sup>-1</sup> EDOT at a sweep rate of 100 mV·s<sup>-1</sup> in the potential range between -0.1 and 1.0 V.

### *The effect of different amount of hematin on catalysis of H<sub>2</sub>O<sub>2</sub>*

Amount of hematin is an important factor to catalyze H<sub>2</sub>O<sub>2</sub>. The current response of H<sub>2</sub>O<sub>2</sub> is different with altering of concentration of hematin (Fig. s2). We have prepared a series of GCE/PEDOT/PBA/Hematin sensors with different amount of hematin from 0.01 μmol·L<sup>-1</sup>~5 mmol·L<sup>-1</sup>, and the volume is 4 μL. From Fig. s2, we can determine the optimal concentration of hematin is 0.1 mmol·L<sup>-1</sup>, the volume of modification is 4 μL.

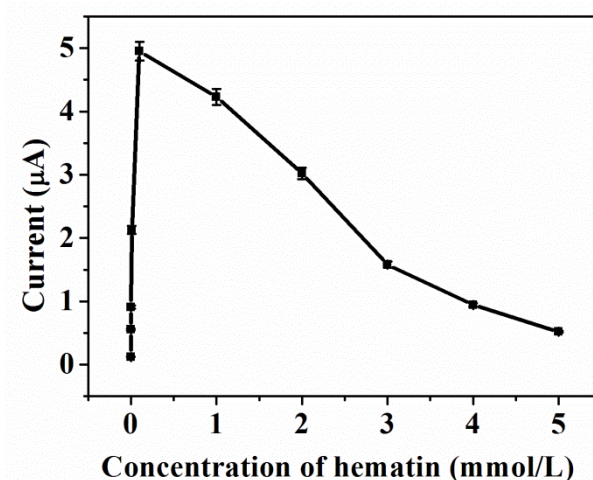

Fig. s2 Different current response of H<sub>2</sub>O<sub>2</sub> (0.08 mmol·L<sup>-1</sup>) on GCE/PEDOT-PBA-Hematin sensors with a series

of amount of hematin from  $4 \times 10^{-14} \sim 2 \times 10^{-8}$  mol. (The scan rate is  $100 \text{ mV} \cdot \text{s}^{-1}$ . pH of PBS is 7.0.)

## References

1. W. M. Si, W. Lei, Y. H. Zhang, M. Z. Xia, F. Y. Wang and Q. L. Hao, *Electrochimica Acta*. 2012, 85, 295
